# Supplementary material
Source: publisher figshare collection journal article supplement (https://acs.figshare.com/ndownloader/files/4585615)
Supplement: Supplementary file 1 [file 4585615]

## **Preparation of cross-linked fluoroalkyl end-capped cooligomeric nanoparticles-encapsulated fullerenes**

A typical procedure for the preparation of cross-linked fluoroalkyl end-capped cooligomeric nanoparticles-encapsulated fullerene by the use of  $\alpha,\omega$ -bis(perfluoro-1-methyl-2-oxapentylated) isocyanatoethyl methacrylate 2-butanone oxime adduct - 1-hydroxy-5-adamantylacrylate cooligomers [ $R_F$ -(IEM-BO) $_x$ -(Ad-HAc) $_y$ - $R_F$ ;  $R_F$  = CF(CF<sub>3</sub>)OC<sub>3</sub>F<sub>7</sub>;  $x : y = 23 : 77$ ; Mn = 8460] is as follows: To an *N,N*-dimethylformamide [DMF] (20 ml) solution of  $R_F$ -(IEM-BO) $_x$ -(Ad-HAc) $_y$ - $R_F$  cooligomer (1.0 g), which was prepared by the cooligomerization of the corresponding monomers and fluoroalkanoyl peroxide according to our previously reported method<sup>[1]</sup>, was added C<sub>60</sub> (0.5 mg). The mixture was stirred at 130 °C for 1 hr. After the solvent was evaporated off under reduced pressure, the crude products were reprecipitated from methanol-acetone to give cross-linked fluoroalkyl end-capped cooligomeric nanoparticles-encapsulated fullerenes [cross-linked  $R_F$ -(IEM) $_x$ -(Ad-HAc) $_y$ - $R_F$ /C<sub>60</sub>;  $R_F$  = CF(CF<sub>3</sub>)OC<sub>3</sub>F<sub>7</sub>] (0.57 g). This nanoparticle exhibited the following FT-IR spectra characteristic: IR(cm<sup>-1</sup>) 3395 (OH), 1732 (C=O), 1308 (CF<sub>3</sub>), 1257(CF<sub>2</sub>). Other  $R_F$ -(IEM) $_x$ -(Ad-HAc) $_y$ - $R_F$  nanoparticles-encapsulated fullerene were prepared under similar conditions. Cross-linked  $R_F$ -(IEM) $_x$ -(Ad-HAc) $_y$ - $R_F$  nanoparticles were also prepared according to our previously reported method<sup>[1]</sup>; however, this nanoparticle exhibited a similar FT-IR spectra characteristic as

that of  $R_F-(IEM)_x-(Ad-HAc)_y-R_F$  nanoparticles-encapsulated fullerene. These results are as follows:

| Run | $R_F-(IEM-BO)_x-(Ad-HAc)_y-R_F$ <sup>a)</sup><br>(mmol) | $C_{60}$<br>(mg) | Product<br>Yield <sup>b)</sup><br>(%) |
|-----|---------------------------------------------------------|------------------|---------------------------------------|
| 1   | 0.12                                                    | 0.5              | 63                                    |
| 2   | 0.12                                                    | 1                | 49                                    |
| 3   | 0.12                                                    | 5                | 47                                    |
| 4   | 0.12                                                    | 10               | 45                                    |
| 5   | 0.12                                                    | 30               | 70                                    |
| 6   | 0.12                                                    | 60               | 61                                    |

a)  $R_F = CF(CF_3)OC_3F_7$

b) Yield based on  $R_F-(IEM-BO)_x-(Ad-HAc)_y-R_F$  and  $C_{60}$

### **Preparation of cross-linked fluoroalkyl end-capped cooligomeric nanoparticles-encapsulated fullerenes by the use of fluoroalkyl end-capped isocyanato cooligomers**

A typical procedure for the preparation of cross-linked fluoroalkyl end-capped cooligomeric nanoparticles-encapsulated fullerene by the use of fluoroalkyl end-capped isocyanato cooligomers is as follows:

Perfluoro-2-methyl-3-oxahexanoyl peroxide (2.4 mmol) in 1 : 1 mixed solvents (AK-225) of 1,1-dichloro-2,2,3,3,3-pentafluoropropane and 1,3-dichloro-1,2,2,3,3-pentafluoropropane (15 g) was added to a mixture of isocyanatoethyl acrylate [IEA] (11.9 mmol), *N*-(1,1-dimethyl-3-oxobutyl)acrylamide [DOBAA] (8.7 mmol) and AK-225 (200 g). The solution was stirred at 45 °C for 1 hr under nitrogen, and to this solution was added a homogeneous toluene solution

containing fluoroalkyl end-capped DOBAA oligomer/C<sub>60</sub> nanocomposites, which were prepared by stirring well a toluene solution (5.0 ml) of fluoroalkyl end-capped DOBAA homooligomer [R<sub>F</sub>-(DOBAA)<sub>n</sub>-R<sub>F</sub>; R<sub>F</sub> = CF(CF<sub>3</sub>)OC<sub>3</sub>F<sub>7</sub>; Mn = 12100 (20 mg)]<sup>[2]</sup> and fullerene (20 mg) with a magnetic stirring bar at room temperature for 2 days. Then, water (50 ml) was added to the solution thus obtained, and this solution was stirred at 45 °C for 4 hr under nitrogen. After the removal of solvent, the obtained crude products were washed well with AK-225, which exhibits a good solubility for IEA, DOBAA and R<sub>F</sub>-(DOBAA)<sub>n</sub>-R<sub>F</sub> homooligomer, to afford directly cross-linked fluoroalkyl end-capped cooligomeric nanoparticles-encapsulated fullerene [cross-linked R<sub>F</sub>-(IEA)<sub>x</sub>-(DOBAA)<sub>y</sub>-R<sub>F</sub>/C<sub>60</sub>; R<sub>F</sub> = CF(CF<sub>3</sub>)OC<sub>3</sub>F<sub>7</sub>] (1.63 g). This nanoparticle exhibited the following FT-IR spectra characteristic: IR(cm<sup>-1</sup>) 1716, 1651, 1551 (C=O, C=ONH), 1310 (CF<sub>3</sub>), 1242 (CF<sub>2</sub>). Other R<sub>F</sub>-(IEM)<sub>x</sub>-(DOBAA)<sub>y</sub>-R<sub>F</sub> nanoparticles-encapsulated fullerene were prepared under similar conditions. Cross-linked R<sub>F</sub>-(IEM)<sub>x</sub>-(DOBAA)<sub>y</sub>-R<sub>F</sub> nanoparticles were also prepared under similar conditions; however, this nanoparticle exhibited a similar FT-IR spectra characteristic as that of R<sub>F</sub>-(IEM)<sub>x</sub>-(Ad-HAc)<sub>y</sub>-R<sub>F</sub> nanoparticles-encapsulated fullerene. These results are as follows:

| Run | (R <sub>F</sub> COO) <sub>2</sub> <sup>a)</sup><br>(mmol) | IEA<br>(mmol) | DOBAA<br>(mmol) | C <sub>60</sub> <sup>b)</sup><br>(mg) | Nanoparticles<br>Yield <sup>c)</sup><br>(%) |
|-----|-----------------------------------------------------------|---------------|-----------------|---------------------------------------|---------------------------------------------|
| 7   | 2.4                                                       | 11.9          | 8.7             | 20                                    | 36                                          |
| 8   | 4.8                                                       | 23.8          | 17.4            | 300                                   | 63                                          |
| 9   | 2.4                                                       | 11.9          | 8.7             | 250                                   | 24                                          |

a) R<sub>F</sub> = CF(CF<sub>3</sub>)OC<sub>3</sub>F<sub>7</sub>

b) R<sub>F</sub>-(DOBAA)<sub>n</sub>-R<sub>F</sub> homooligomer [R<sub>F</sub> = CF(CF<sub>3</sub>)OC<sub>3</sub>F<sub>7</sub>, Mn = 12100: 20 mg) was used in each case

c) Yield based on R<sub>F</sub>-(IEM-BO)<sub>x</sub>-(Ad-HAc)<sub>y</sub>-R<sub>F</sub> and C<sub>60</sub>

[1] Mugisawa, M.; Ueno, K.; Hamazaki, K.; Sawada, H. *Macromol. Rapid Commun.* **2007**, *28*, 733 ~ 739.

[2] Fluoroalkyl end-capped DOBAA homooligomer was prepared according to our previously reported method: Sawada, H.; Yoshino, Y.; Kurachi, M.; Kawase, T.; Takishita, K.; Tanedani, *Polymer* **2000**, *41*, 397 ~ 400.
